# Supplementary material
Source: PubMed Central journal article supplement (PMC3421056)
Supplement: NIHMS394493-supplement-Figure_1S__supplemental_.pdf [file NIHMS394493-supplement-Figure_1S__supplemental_.pdf]

Supplement Material: Figure I

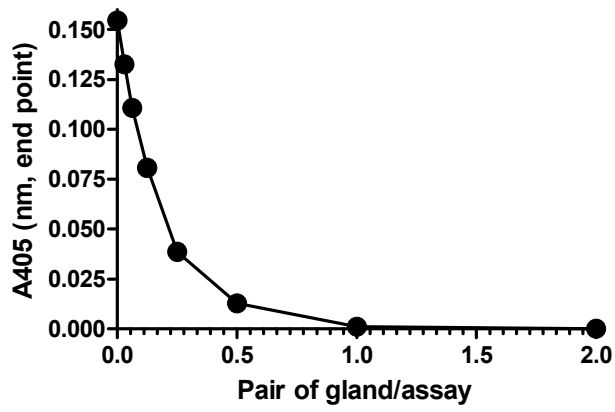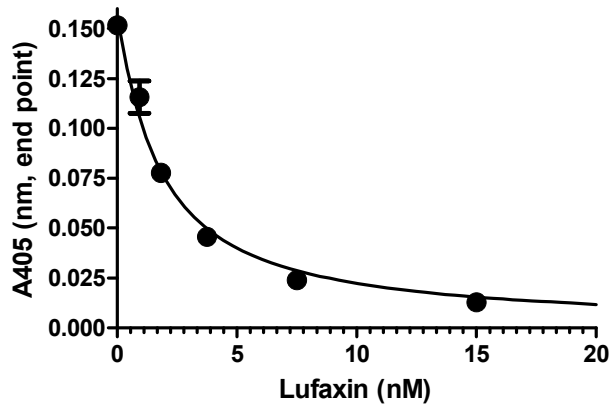

**Figure I. Comparison of FXa inhibition by purified Lufaxin and *L. longipalpis* salivary gland. FXa (0.5 nM) was incubated for 1 hr with the indicated concentrations of SGH or Lufaxin, followed by addition of S2222 (250  $\mu$ M). After 30 min, substrate hydrolysis was estimated at 405 nm.**
